# Supplementary material for: Concordance of Disclosed Hospital Prices With Total Reimbursements for Hospital-Based Care Among Commercially Insured Patients in the US
Source: PubMed Central journal article supplement (PMC8669520; doi:10.1001/jamanetworkopen.2021.37390), 2021-12-13
Supplement: jamanetwopen-e2137390-s001.pdf [file jamanetwopen-e2137390-s001.pdf]

## Supplemental Online Content

Horný M, Shafer PR, Dusetzina SB. Concordance of disclosed hospital prices with total reimbursements for hospital-based care among commercially insured patients in the US. *JAMA Netw Open*. 2021;4(12):e2137390.  
doi:10.1001/jamanetworkopen.2021.37390

**eTable 1.** List of Ancillary Services that Could be Provided and Billed in Connection to the Primary Shoppable Health Care Service

**eFigure 1.** Flowchart of Sample Inclusion and Exclusion Criteria

**eTable 2.** Flowchart of Sample Inclusion and Exclusion Criteria by Service

**eFigure 2.** Total Reimbursement for Service Packages Ranked by the Portion of Reimbursement Billed by the Hospital for Selected Common Shoppable Health Care Services

This supplemental material has been provided by the authors to give readers additional information about their work.

**eTable 1.** List of Ancillary Services that Could be Provided and Billed in Connection to the Primary Shoppable Health Care Service

| Primary shoppable service                                                                                                               | Setting    | Ancillary service included in package if billed together with the primary shoppable service                                                                                        | Procedure code   | Service-specific inclusion criteria | Package-specific exclusion criteria |
|-----------------------------------------------------------------------------------------------------------------------------------------|------------|------------------------------------------------------------------------------------------------------------------------------------------------------------------------------------|------------------|-------------------------------------|-------------------------------------|
| <b>EVALUATION &amp; MANAGEMENT</b>                                                                                                      |            |                                                                                                                                                                                    |                  |                                     |                                     |
| Psychotherapy, 30/45/60 min (CPT 90832, 90834, 90837); Family psychotherapy, including/not including patient, 50 min (CPT 90846, 90847) | Outpatient | Facility fee                                                                                                                                                                       |                  |                                     |                                     |
|                                                                                                                                         |            | Psychiatric diagnostic evaluation                                                                                                                                                  | 90791-2          |                                     |                                     |
|                                                                                                                                         |            | Office or other outpatient visit for the evaluation and management of a new patient                                                                                                | 99201-5          | Only if billed by a psychiatrist    |                                     |
|                                                                                                                                         |            | Office or other outpatient visit for the evaluation and management of an established patient                                                                                       | 99211-5          | Only if billed by a psychiatrist    |                                     |
|                                                                                                                                         |            | Drug test(s), presumptive                                                                                                                                                          | 80305-7, G0477-9 |                                     |                                     |
|                                                                                                                                         |            | Drug test(s), definitive                                                                                                                                                           | G0480-3          |                                     |                                     |
| Group psychotherapy (CPT 90853)                                                                                                         | Outpatient | * Same set of services as for Psychotherapy, 30/45/60 min, Family psychotherapy, including/not including patient, 50 min, with addition of:                                        |                  |                                     |                                     |
|                                                                                                                                         |            | Group psychotherapy other than of a multiple-family group, in a partial hospitalization setting, approximately 45 to 50 minutes                                                    | G0410            |                                     |                                     |
| New patient office or other outpatient visit, typically 30/45/60 min (CPT 99203, 99204, 99205)                                          | Outpatient | Facility fee                                                                                                                                                                       |                  |                                     |                                     |
|                                                                                                                                         |            | Hospital outpatient clinic visit for assessment and management of a patient                                                                                                        | G0463            |                                     |                                     |
|                                                                                                                                         |            | * "New patient office or other outpatient visit" is a broad health service that can be accompanied by various other procedures and services depending on the purpose of the visit. |                  |                                     |                                     |
| Patient office consultation, typically 40/60 min (CPT 99243, 99244)                                                                     | Outpatient | Facility fee                                                                                                                                                                       |                  |                                     |                                     |
| Initial new patient preventive medicine evaluation, 18-39 years (CPT 99385)                                                             | Outpatient | Facility fee                                                                                                                                                                       |                  |                                     |                                     |
|                                                                                                                                         |            | Collection of venous blood by venipuncture                                                                                                                                         | 36415            |                                     |                                     |
|                                                                                                                                         |            | Collection of capillary blood specimen                                                                                                                                             | 36416            |                                     |                                     |
|                                                                                                                                         |            | Laboratory & pathology services                                                                                                                                                    | 8xxxx            |                                     |                                     |
|                                                                                                                                         |            | Immunization administration                                                                                                                                                        | 90471-4          |                                     |                                     |
|                                                                                                                                         |            | Vaccines                                                                                                                                                                           | 90476-749        |                                     |                                     |
|                                                                                                                                         |            | Electrocardiogram, routine ECG                                                                                                                                                     | 93000-5, G0403-5 |                                     |                                     |
|                                                                                                                                         |            | Brief emotional/behavioral assessment                                                                                                                                              | 96127            |                                     |                                     |
| Handling and/or conveyance of specimen for transfer to a laboratory                                                                     | 99000-1    |                                                                                                                                                                                    |                  |                                     |                                     |

| Primary shoppable service                                                                                                                                                                     | Setting    | Ancillary service included in package if billed together with the primary shoppable service                       | Procedure code   | Service-specific inclusion criteria                                                                                 | Package-specific exclusion criteria                                                                                                                 |
|-----------------------------------------------------------------------------------------------------------------------------------------------------------------------------------------------|------------|-------------------------------------------------------------------------------------------------------------------|------------------|---------------------------------------------------------------------------------------------------------------------|-----------------------------------------------------------------------------------------------------------------------------------------------------|
|                                                                                                                                                                                               |            | Administration of influenza virus/pneumococcal/hepatitis B vaccine                                                | G0008-10         |                                                                                                                     |                                                                                                                                                     |
|                                                                                                                                                                                               |            | Cervical or vaginal cancer screening                                                                              | G0101            |                                                                                                                     |                                                                                                                                                     |
|                                                                                                                                                                                               |            | Screening cytopathology                                                                                           | G0123-4, G0141-7 |                                                                                                                     |                                                                                                                                                     |
|                                                                                                                                                                                               |            | Annual alcohol misuse screening                                                                                   | G0442            |                                                                                                                     |                                                                                                                                                     |
|                                                                                                                                                                                               |            | Annual depression screening                                                                                       | G0444            |                                                                                                                     |                                                                                                                                                     |
|                                                                                                                                                                                               |            | Hospital outpatient clinic visit for assessment and management of a patient                                       | G0463            |                                                                                                                     |                                                                                                                                                     |
|                                                                                                                                                                                               |            | HIV antigen/antibody screening                                                                                    | G0475            |                                                                                                                     |                                                                                                                                                     |
|                                                                                                                                                                                               |            | HPV for cervical cancer screening                                                                                 | G0476            |                                                                                                                     |                                                                                                                                                     |
|                                                                                                                                                                                               |            | Screening papanicolaou smear                                                                                      | Q0091            |                                                                                                                     |                                                                                                                                                     |
| Initial new patient preventive medicine evaluation, 40-64 years (CPT 99386)                                                                                                                   | Outpatient | * same set of services as for Initial new patient preventive medicine evaluation (18-39 years), with addition of: |                  |                                                                                                                     |                                                                                                                                                     |
|                                                                                                                                                                                               |            | Prostate cancer screening                                                                                         | G0102-3          |                                                                                                                     |                                                                                                                                                     |
| <b>LABORATORY &amp; PATHOLOGY</b>                                                                                                                                                             |            |                                                                                                                   |                  |                                                                                                                     |                                                                                                                                                     |
| <i>All proposed shoppable laboratory &amp; pathology services (CPT 80048, 80053, 80055, 80061, 80069, 80076, 81000, 81001, 81002, 81003, 84153, 84154, 84443, 85025, 85027, 85610, 85730)</i> | Outpatient | Facility fee                                                                                                      |                  | Only if service was delivered at a hospital that bills for a facility fee for laboratory & pathology services alone | Collection of venous blood by venipuncture not billed (e.g., blood was collected through a port – an indication of a complex health care encounter) |
|                                                                                                                                                                                               |            | Collection of venous blood by venipuncture                                                                        | 36415            |                                                                                                                     |                                                                                                                                                     |
| <b>RADIOLOGY</b>                                                                                                                                                                              |            |                                                                                                                   |                  |                                                                                                                     |                                                                                                                                                     |
| CT scan, head or brain, without contrast (CPT 70450); X-Ray, lower back, minimum four views (CPT 72110); Ultrasound of abdomen (CPT 76700); Abdominal ultrasound of pregnant                  | Outpatient | Facility fee                                                                                                      |                  | Only if service was delivered at a hospital that bills for a facility fee for radiology services alone              |                                                                                                                                                     |

| Primary shoppable service                                                                                                                                                                                                                       | Setting    | Ancillary service included in package <u>if billed together with the primary shoppable service</u> | Procedure code  | Service-specific inclusion criteria                                                                    | Package-specific exclusion criteria |
|-------------------------------------------------------------------------------------------------------------------------------------------------------------------------------------------------------------------------------------------------|------------|----------------------------------------------------------------------------------------------------|-----------------|--------------------------------------------------------------------------------------------------------|-------------------------------------|
| uterus, greater or equal to 14 weeks 0 days, single or first fetus (CPT 76805);<br>Ultrasound pelvis through vagina (CPT 76830);<br>Mammography of one breast/both breasts (CPT 77065, 77066);<br>Mammography, screening, bilateral (CPT 77067) |            |                                                                                                    |                 |                                                                                                        |                                     |
| MRI scan of brain before and after contrast (CPT 70553)                                                                                                                                                                                         | Outpatient | Facility fee                                                                                       |                 | Only if service was delivered at a hospital that bills for a facility fee for radiology services alone |                                     |
|                                                                                                                                                                                                                                                 |            | Anesthesia for non-invasive imaging                                                                | 01922           |                                                                                                        |                                     |
|                                                                                                                                                                                                                                                 |            | Contrast material                                                                                  | A95xx, Q9958-67 |                                                                                                        |                                     |
| MRI scan of lower spinal canal (CPT 72148); MRI scan of leg joint (CPT 73721)                                                                                                                                                                   | Outpatient | Facility fee                                                                                       |                 | Only if service was delivered at a hospital that bills for a facility fee for radiology services alone |                                     |
|                                                                                                                                                                                                                                                 |            | Anesthesia for non-invasive imaging                                                                | 01922           |                                                                                                        |                                     |
| CT scan, pelvis, with contrast (CPT 72193);<br>CT scan of abdomen and pelvis with contrast (CPT 74177)                                                                                                                                          | Outpatient | Facility fee                                                                                       |                 | Only if service was delivered at a hospital that bills for a facility fee for radiology services alone |                                     |
|                                                                                                                                                                                                                                                 |            | Contrast material                                                                                  | Q9958-67        |                                                                                                        |                                     |
| <b>MEDICINE &amp; SURGERY</b>                                                                                                                                                                                                                   |            |                                                                                                    |                 |                                                                                                        |                                     |
| Cardiac valve and other major cardiothoracic                                                                                                                                                                                                    | Inpatient  | <i>All services billed during inpatient stay</i>                                                   |                 |                                                                                                        |                                     |

| Primary shoppable service                                                                                                            | Setting    | Ancillary service included in package if billed together with the primary shoppable service | Procedure code | Service-specific inclusion criteria | Package-specific exclusion criteria |
|--------------------------------------------------------------------------------------------------------------------------------------|------------|---------------------------------------------------------------------------------------------|----------------|-------------------------------------|-------------------------------------|
| procedures with cardiac catheterization with major complications or comorbidities (DRG 216)                                          |            |                                                                                             |                |                                     |                                     |
| Spinal fusion except cervical without major comorbid conditions or complications (DRG 460)                                           | Inpatient  | <i>All services billed during inpatient stay</i>                                            |                |                                     |                                     |
| Major joint replacement or reattachment of lower extremity without major comorbid conditions or complications (DRG 470)              | Inpatient  | <i>All services billed during inpatient stay</i>                                            |                |                                     |                                     |
| Cervical spinal fusion without comorbid conditions or major comorbid conditions or complications (DRG 473)                           | Inpatient  | <i>All services billed during inpatient stay</i>                                            |                |                                     |                                     |
| Uterine and adnexa procedures for non-malignancy without comorbid conditions or major comorbid conditions or complications (DRG 743) | Inpatient  | <i>All services billed during inpatient stay</i>                                            |                |                                     |                                     |
|                                                                                                                                      | Outpatient | Facility fee                                                                                |                |                                     |                                     |

| Primary shoppable service                                      | Setting    | Ancillary service included in package if billed together with the primary shoppable service                                     | Procedure code | Service-specific inclusion criteria | Package-specific exclusion criteria |
|----------------------------------------------------------------|------------|---------------------------------------------------------------------------------------------------------------------------------|----------------|-------------------------------------|-------------------------------------|
| Removal of 1 or more breast growth, open procedure (CPT 19120) |            | Anesthesia for procedures on the integumentary system on the extremities, anterior trunk and perineum                           | 00400, 00402   |                                     |                                     |
|                                                                |            | Excision, benign lesion including margins, except skin tag (unless listed elsewhere), trunk, arms or legs                       | 11400-6        |                                     |                                     |
|                                                                |            | Repair, intermediate, wounds of scalp, axillae, trunk and/or extremities; 2.6 cm to 7.5 cm                                      | 12032          |                                     |                                     |
|                                                                |            | Adjacent Tissue Transfer or Rearrangement                                                                                       | 14000-21       |                                     |                                     |
|                                                                |            | Placement of breast localization device(s), percutaneous; first lesion                                                          | 19281, 19285   |                                     |                                     |
|                                                                |            | Revision of reconstructed breast                                                                                                | 19380          |                                     |                                     |
|                                                                |            | Collection of venous blood by venipuncture                                                                                      | 36415          |                                     |                                     |
|                                                                |            | Biopsy or excision of lymph node(s); open deep axillary node(s)                                                                 | 38525          |                                     |                                     |
|                                                                |            | Injection procedure; lymphangiography; radioactive tracer for identification of sentinel node                                   | 38792          |                                     |                                     |
|                                                                |            | Intraoperative identification (eg, mapping) of sentinel lymph node(s) includes injection of non-radioactive dye, when performed | 38900          |                                     |                                     |
|                                                                |            | Radiological examination, surgical specimen                                                                                     | 76098          |                                     |                                     |
|                                                                |            | Ultrasound, breast, unilateral, real time with image documentation; limited                                                     | 76642          |                                     |                                     |
|                                                                |            | Ultrasonic guidance, intraoperative                                                                                             | 76998          |                                     |                                     |
|                                                                |            | Laboratory & pathology services                                                                                                 | 8xxxx          |                                     |                                     |
|                                                                |            | Electrocardiogram, routine ECG; tracing only                                                                                    | 93005          |                                     |                                     |
|                                                                |            | Injection, bupivacaine liposome                                                                                                 | C9290          |                                     |                                     |
|                                                                |            | Drugs administered other than oral method                                                                                       | Jxxxx          |                                     |                                     |
|                                                                |            | Injection, non-radioactive, non-contrast, visualization adjunct                                                                 | Q9968          |                                     |                                     |
|                                                                |            | Injection, bupivacaine hydrochloride                                                                                            | S0020          |                                     |                                     |
| Shaving of shoulder bone using an arthroscope (CPT 29826)      | Outpatient | Facility fee                                                                                                                    |                |                                     |                                     |
|                                                                |            | Anesthesia for all procedures on nerves, muscles, tendons, fascia, and bursae of shoulder and axilla                            | 01610          |                                     |                                     |

| Primary shoppable service                                    | Setting    | Ancillary service included in package if billed together with the primary shoppable service                                                           | Procedure code   | Service-specific inclusion criteria | Package-specific exclusion criteria |
|--------------------------------------------------------------|------------|-------------------------------------------------------------------------------------------------------------------------------------------------------|------------------|-------------------------------------|-------------------------------------|
|                                                              |            | Anesthesia for diagnostic arthroscopic procedures of shoulder joint                                                                                   | 01622            |                                     |                                     |
|                                                              |            | Anesthesia for open or surgical arthroscopic procedures on humeral head and neck, sternoclavicular joint, acromioclavicular joint, and shoulder joint | 01630            |                                     |                                     |
|                                                              |            | Arthroscopy, shoulder, surgical                                                                                                                       | 29806-25, 27, 28 |                                     |                                     |
|                                                              |            | Collection of venous blood by venipuncture                                                                                                            | 36415            |                                     |                                     |
|                                                              |            | Injection, anesthetic agent; brachial plexus, single                                                                                                  | 64415            |                                     |                                     |
|                                                              |            | Injection, anesthetic agent; trigeminal nerve; brachial plexus, continuous infusion by catheter                                                       | 64416            |                                     |                                     |
|                                                              |            | Ultrasonic guidance for needle placement (eg, biopsy, aspiration, injection, localization device), imaging supervision and interpretation             | 76942            |                                     |                                     |
|                                                              |            | Laboratory & pathology services                                                                                                                       | 8xxxx            |                                     |                                     |
|                                                              |            | Electrocardiogram, routine ECG; tracing only                                                                                                          | 93005            |                                     |                                     |
|                                                              |            | Anchor/screw for opposing bone-to-bone or soft tissue-to-bone (implantable);                                                                          | C1713            |                                     |                                     |
|                                                              |            | Injection, bupivacaine liposome                                                                                                                       | C9290            |                                     |                                     |
|                                                              |            | Drugs administered other than oral method                                                                                                             | Jxxxx            |                                     |                                     |
|                                                              |            | Shoulder orthosis, prefabricated, off-the-shelf                                                                                                       | L3650-78         |                                     |                                     |
|                                                              |            | Shoulder elbow wrist hand orthosis, abduction positioning, airplane design, prefabricated, includes fitting and adjustment                            | L3960            |                                     |                                     |
|                                                              |            | Injection, bupivacaine hydrochloride                                                                                                                  | S0020            |                                     |                                     |
| Removal of one knee cartilage using an endoscope (CPT 29881) | Outpatient | Facility fee                                                                                                                                          |                  |                                     |                                     |
|                                                              |            | Anesthesia for all procedures on nerves, muscles, tendons, fascia, and bursae of shoulder and axilla                                                  | 01610            |                                     |                                     |
|                                                              |            | Anesthesia for diagnostic arthroscopic procedures of shoulder joint                                                                                   | 01622            |                                     |                                     |
|                                                              |            | Anesthesia for open or surgical arthroscopic procedures on humeral head and neck, sternoclavicular joint, acromioclavicular joint, and shoulder joint | 01630            |                                     |                                     |

| Primary shoppable service                                                     | Setting    | Ancillary service included in package if billed together with the primary shoppable service                                               | Procedure code   | Service-specific inclusion criteria | Package-specific exclusion criteria |
|-------------------------------------------------------------------------------|------------|-------------------------------------------------------------------------------------------------------------------------------------------|------------------|-------------------------------------|-------------------------------------|
|                                                                               |            | Arthroscopy, shoulder, surgical                                                                                                           | 29806-25, 27, 28 |                                     |                                     |
|                                                                               |            | Collection of venous blood by venipuncture                                                                                                | 36415            |                                     |                                     |
|                                                                               |            | Injection, anesthetic agent; brachial plexus, single                                                                                      | 64415            |                                     |                                     |
|                                                                               |            | Injection, anesthetic agent; trigeminal nerve; brachial plexus, continuous infusion by catheter                                           | 64416            |                                     |                                     |
|                                                                               |            | Ultrasonic guidance for needle placement (eg, biopsy, aspiration, injection, localization device), imaging supervision and interpretation | 76942            |                                     |                                     |
|                                                                               |            | Laboratory & pathology services                                                                                                           | 8xxxx            |                                     |                                     |
|                                                                               |            | Electrocardiogram, routine ECG; tracing only                                                                                              | 93005            |                                     |                                     |
|                                                                               |            | Anchor/screw for opposing bone-to-bone or soft tissue-to-bone (implantable);                                                              | C1713            |                                     |                                     |
|                                                                               |            | Injection, bupivacaine liposome                                                                                                           | C9290            |                                     |                                     |
|                                                                               |            | Drugs administered other than oral method                                                                                                 | Jxxxx            |                                     |                                     |
|                                                                               |            | Shoulder orthosis, prefabricated, off-the-shelf                                                                                           | L3650-78         |                                     |                                     |
|                                                                               |            | Shoulder elbow wrist hand orthosis, abduction positioning, airplane design, prefabricated, includes fitting and adjustment                | L3960            |                                     |                                     |
|                                                                               |            | Injection, bupivacaine hydrochloride                                                                                                      | S0020            |                                     |                                     |
| Removal of tonsils and adenoid glands patient younger than age 12 (CPT 42820) | Outpatient | Facility fee                                                                                                                              |                  |                                     |                                     |
|                                                                               |            | Anesthesia for intraoral procedures, including biopsy                                                                                     | 00170            |                                     |                                     |
|                                                                               |            | Ablation, soft tissue of inferior turbinates, unilateral or bilateral, any method; intramural (i.e., submucosal)                          | 30802            |                                     |                                     |
|                                                                               |            | Collection of venous blood by venipuncture                                                                                                | 36415            |                                     |                                     |
|                                                                               |            | Laboratory & pathology services                                                                                                           | 8xxxx            |                                     |                                     |
|                                                                               |            | Initial observation care, per day                                                                                                         | 99218-20         |                                     |                                     |
|                                                                               |            | Surgical supply; miscellaneous                                                                                                            | A4649            |                                     |                                     |
|                                                                               |            | Hospital observation                                                                                                                      | G0378            |                                     |                                     |
|                                                                               |            | Drugs administered other than oral method                                                                                                 | Jxxxx            |                                     |                                     |
| Diagnostic examination of esophagus, stomach, and/or upper small              | Outpatient | Facility fee                                                                                                                              |                  |                                     |                                     |
|                                                                               |            | Anesthesia for procedures on the upper abdomen                                                                                            | 00731            |                                     |                                     |
|                                                                               |            | Laboratory & pathology services                                                                                                           | 8xxxx            |                                     |                                     |



| Primary shoppable service                                                                 | Setting    | Ancillary service included in package if billed together with the primary shoppable service                                                | Procedure code | Service-specific inclusion criteria | Package-specific exclusion criteria |
|-------------------------------------------------------------------------------------------|------------|--------------------------------------------------------------------------------------------------------------------------------------------|----------------|-------------------------------------|-------------------------------------|
| bowel using an endoscope (CPT 43235)                                                      |            | Esophagus, gastroesophageal reflux test; with mucosal attached telemetry pH electrode placement                                            | 91035          |                                     |                                     |
|                                                                                           |            | Moderate sedation services                                                                                                                 | 99152          |                                     |                                     |
|                                                                                           |            | Moderate sedation services                                                                                                                 | G0500          |                                     |                                     |
|                                                                                           |            | Drugs administered other than oral method                                                                                                  | Jxxxx          |                                     |                                     |
| Biopsy of the esophagus, stomach, and/or upper small bowel using an endoscope (CPT 43239) | Outpatient | * same set of services as for Diagnostic examination of esophagus, stomach, and/or upper small bowel using an endoscope, with addition of: |                |                                     |                                     |
|                                                                                           |            | Diagnostic examination of esophagus, stomach, and/or upper small bowel using an endoscope                                                  | 43235          |                                     |                                     |
| Diagnostic examination of large bowel using an endoscope (CPT 45378)                      | Outpatient | Facility fee                                                                                                                               |                |                                     |                                     |
|                                                                                           |            | Anesthesia for procedures on the lower abdomen                                                                                             | 00811-3        |                                     |                                     |
|                                                                                           |            | Anesthesia for anorectal procedure                                                                                                         | 00902          |                                     |                                     |
|                                                                                           |            | Laboratory & pathology services                                                                                                            | 8xxxx          |                                     |                                     |
|                                                                                           |            | Moderate sedation services                                                                                                                 | 99152          |                                     |                                     |
|                                                                                           |            | Moderate sedation services                                                                                                                 | G0500          |                                     |                                     |
| Biopsy of large bowel using an endoscope (CPT 45380)                                      | Outpatient | * same set of services as for Diagnostic examination of large bowel using an endoscope, with addition of:                                  |                |                                     |                                     |
|                                                                                           |            | Diagnostic examination of large bowel using an endoscope                                                                                   | 45378          |                                     |                                     |
| Removal of polyps or growths of large bowel using an endoscope (CPT 45385)                | Outpatient | * same set of services as for Biopsy of large bowel using an endoscope                                                                     |                |                                     |                                     |
| Ultrasound examination of lower large bowel using an endoscope (CPT 45391)                | Outpatient | Facility fee                                                                                                                               |                |                                     |                                     |
|                                                                                           |            | Anesthesia for procedures on the lower abdomen                                                                                             | 00811-3        |                                     |                                     |
|                                                                                           |            | Anesthesia for anorectal procedure                                                                                                         | 00902          |                                     |                                     |
|                                                                                           |            | Moderate sedation services                                                                                                                 | 99152          |                                     |                                     |
|                                                                                           |            | Moderate sedation services                                                                                                                 | G0500          |                                     |                                     |
|                                                                                           |            | Drugs administered other than oral method                                                                                                  | Jxxxx          |                                     |                                     |

| Primary shoppable service                             | Setting    | Ancillary service included in package if billed together with the primary shoppable service                   | Procedure code | Service-specific inclusion criteria | Package-specific exclusion criteria                                                                                                                           |
|-------------------------------------------------------|------------|---------------------------------------------------------------------------------------------------------------|----------------|-------------------------------------|---------------------------------------------------------------------------------------------------------------------------------------------------------------|
| Removal of gallbladder using an endoscope (CPT 47562) | Inpatient  | <i>All services billed during inpatient stay</i>                                                              |                |                                     | DRG other than 419 – Laparoscopic cholecystectomy without common bile duct exploration without complication, comorbidity or major complication or comorbidity |
|                                                       | Outpatient | Anesthesia for intraperitoneal procedures in upper abdomen including laparoscopy                              | 00790          |                                     |                                                                                                                                                               |
|                                                       |            | Collection of venous blood by venipuncture                                                                    | 36415          |                                     |                                                                                                                                                               |
|                                                       |            | Transversus abdominis plane (TAP) block (abdominal plane block, rectus sheath block) bilateral; by injections | 64488          |                                     |                                                                                                                                                               |
|                                                       |            | Ultrasound, abdominal, real time with image documentation; limited                                            | 76705          |                                     |                                                                                                                                                               |
|                                                       |            | Laboratory & pathology services                                                                               | 8xxxx          |                                     |                                                                                                                                                               |
|                                                       |            | Electrocardiogram, routine ECG; tracing only                                                                  | 93005          |                                     |                                                                                                                                                               |
|                                                       |            | Intravenous infusion, hydration                                                                               | 96360-1        |                                     |                                                                                                                                                               |
|                                                       |            | Intravenous infusion, for therapy, prophylaxis, or diagnosis                                                  | 96365-8        |                                     |                                                                                                                                                               |
|                                                       |            | Intravenous push, single or initial substance/drug                                                            | 96374-6        |                                     |                                                                                                                                                               |
|                                                       |            | Initial observation care, per day                                                                             | 99218-20       |                                     |                                                                                                                                                               |
|                                                       |            | Injection, pantoprazole sodium                                                                                | C9113          |                                     |                                                                                                                                                               |
|                                                       |            | Injection, bupivacaine liposome                                                                               | C9290          |                                     |                                                                                                                                                               |
|                                                       |            | Hospital observation                                                                                          | G0378          |                                     |                                                                                                                                                               |
|                                                       |            | Drugs administered other than oral method                                                                     | Jxxxx          |                                     |                                                                                                                                                               |
|                                                       |            | Injection, bupivacaine hydrochloride                                                                          | S0020          |                                     |                                                                                                                                                               |
|                                                       |            | Injection, famotidine                                                                                         | S0028          |                                     |                                                                                                                                                               |
|                                                       |            | Surgical techniques requiring use of robotic surgical system                                                  | S2900          |                                     |                                                                                                                                                               |
|                                                       |            | Outpatient                                                                                                    | Facility fee   |                                     |                                                                                                                                                               |
|                                                       |            | Anesthesia for hernia repairs in lower abdomen                                                                | 00830          |                                     |                                                                                                                                                               |

| Primary shoppable service                                                                      | Setting    | Ancillary service included in package if billed together with the primary shoppable service                   | Procedure code | Service-specific inclusion criteria | Package-specific exclusion criteria |
|------------------------------------------------------------------------------------------------|------------|---------------------------------------------------------------------------------------------------------------|----------------|-------------------------------------|-------------------------------------|
| Repair of groin hernia patient age 5 years or older (CPT 49505)                                |            | Anesthesia for intraperitoneal procedures in lower abdomen including laparoscopy                              | 00840          |                                     |                                     |
|                                                                                                |            | Collection of venous blood by venipuncture                                                                    | 36415          |                                     |                                     |
|                                                                                                |            | Transversus abdominis plane (TAP) block (abdominal plane block, rectus sheath block) unilateral; by injection | 64486          |                                     |                                     |
|                                                                                                |            | Transversus abdominis plane (TAP) block (abdominal plane block, rectus sheath block) bilateral; by injections | 64488          |                                     |                                     |
|                                                                                                |            | Laboratory & pathology services                                                                               | 8xxxx          |                                     |                                     |
|                                                                                                |            | Electrocardiogram, routine ECG; tracing only                                                                  | 93005          |                                     |                                     |
|                                                                                                |            | Mesh (implantable)                                                                                            | C1781          |                                     |                                     |
|                                                                                                |            | Injection, bupivacaine liposome                                                                               | C9290          |                                     |                                     |
|                                                                                                |            | Drugs administered other than oral method                                                                     | Jxxxx          |                                     |                                     |
|                                                                                                |            | Injection, bupivacaine hydrochloride                                                                          | S0020          |                                     |                                     |
| Biopsy of prostate gland (CPT 55700)                                                           | Outpatient | Facility fee                                                                                                  |                |                                     |                                     |
|                                                                                                |            | Anesthesia for procedures on the integumentary system on the extremities, anterior trunk and perineum         | 00400          |                                     |                                     |
|                                                                                                |            | Anesthesia for; anorectal procedure                                                                           | 00902          |                                     |                                     |
|                                                                                                |            | Anesthesia for transurethral procedures                                                                       | 00910          |                                     |                                     |
|                                                                                                |            | Collection of venous blood by venipuncture                                                                    | 36415          |                                     |                                     |
|                                                                                                |            | Injection, anesthetic agent; other peripheral nerve or branch                                                 | 64450          |                                     |                                     |
|                                                                                                |            | 3D rendering with interpretation and reporting                                                                | 76377          |                                     |                                     |
|                                                                                                |            | Ultrasound, transrectal                                                                                       | 76872          |                                     |                                     |
|                                                                                                |            | Ultrasonic guidance for needle placement                                                                      | 76942          |                                     |                                     |
|                                                                                                |            | Ultrasonic guidance, intraoperative                                                                           | 76988          |                                     |                                     |
|                                                                                                |            | Laboratory & pathology services                                                                               | 8xxxx          |                                     |                                     |
|                                                                                                |            | Electrocardiogram, routine ECG; tracing only                                                                  | 93005          |                                     |                                     |
|                                                                                                |            | Therapeutic, prophylactic, or diagnostic injection; subcutaneous or intramuscular                             | 96372          |                                     |                                     |
|                                                                                                |            | Moderate sedation services                                                                                    | 99152          |                                     |                                     |
| Surgical pathology, gross and microscopic examinations, for prostate needle biopsy, any method | G0416      |                                                                                                               |                |                                     |                                     |

| Primary shoppable service                                                               | Setting    | Ancillary service included in package if billed together with the primary shoppable service                   | Procedure code | Service-specific inclusion criteria | Package-specific exclusion criteria                                                                                                                                      |
|-----------------------------------------------------------------------------------------|------------|---------------------------------------------------------------------------------------------------------------|----------------|-------------------------------------|--------------------------------------------------------------------------------------------------------------------------------------------------------------------------|
|                                                                                         |            | Drugs administered other than oral method                                                                     | Jxxxx          |                                     |                                                                                                                                                                          |
| Surgical removal of prostate and surrounding lymph nodes using an endoscope (CPT 55866) | Inpatient  | <i>All services billed during inpatient stay</i>                                                              |                |                                     | DRG other than 708 – Major male pelvic procedures without complication, comorbidity or major complication or comorbidity; or concurrent cystectomy: 51570-96 also billed |
|                                                                                         | Outpatient | Facility fee                                                                                                  |                |                                     | Concurrent cystectomy: 51570-96 also billed                                                                                                                              |
|                                                                                         |            | Collection of venous blood by venipuncture                                                                    | 36415          |                                     |                                                                                                                                                                          |
|                                                                                         |            | Laparoscopy, surgical; with retroperitoneal lymph node sampling (biopsy), single or multiple                  | 38570          |                                     |                                                                                                                                                                          |
|                                                                                         |            | Laparoscopy, surgical; with bilateral total pelvic lymphadenectomy                                            | 38571          |                                     |                                                                                                                                                                          |
|                                                                                         |            | Transversus abdominis plane (TAP) block (abdominal plane block, rectus sheath block) bilateral; by injections | 64488          |                                     |                                                                                                                                                                          |
|                                                                                         |            | Laboratory & pathology services                                                                               | 8xxxx          |                                     |                                                                                                                                                                          |
|                                                                                         |            | Electrocardiogram, routine ECG; tracing only                                                                  | 93005          |                                     |                                                                                                                                                                          |
|                                                                                         |            | Noninvasive ear or pulse oximetry for oxygen saturation;                                                      | 94760-1        |                                     |                                                                                                                                                                          |
|                                                                                         |            | Intravenous infusion, hydration                                                                               | 96360-1        |                                     |                                                                                                                                                                          |
|                                                                                         |            | Intravenous infusion, for therapy, prophylaxis, or diagnosis                                                  | 96365-8        |                                     |                                                                                                                                                                          |
|                                                                                         |            | Intravenous push, single or initial substance/drug                                                            | 96374-6        |                                     |                                                                                                                                                                          |
|                                                                                         |            | Initial observation care, per day                                                                             | 99218-20       |                                     |                                                                                                                                                                          |
|                                                                                         |            | Catheter, drainage                                                                                            | C1729          |                                     |                                                                                                                                                                          |
|                                                                                         |            | Catheter, ureteral                                                                                            | C1758          |                                     |                                                                                                                                                                          |
| Closure device, vascular                                                                | C1760      |                                                                                                               |                |                                     |                                                                                                                                                                          |
| Connective tissue, human                                                                | C1762      |                                                                                                               |                |                                     |                                                                                                                                                                          |
| Guide wire                                                                              | C1769      |                                                                                                               |                |                                     |                                                                                                                                                                          |

| Primary shoppable service                                                                                                  | Setting    | Ancillary service included in package if billed together with the primary shoppable service | Procedure code | Service-specific inclusion criteria | Package-specific exclusion criteria                                                                                             |
|----------------------------------------------------------------------------------------------------------------------------|------------|---------------------------------------------------------------------------------------------|----------------|-------------------------------------|---------------------------------------------------------------------------------------------------------------------------------|
|                                                                                                                            |            | Mesh (implantable)                                                                          | C1781          |                                     |                                                                                                                                 |
|                                                                                                                            |            | Port, indwelling (implantable)                                                              | C1788          |                                     |                                                                                                                                 |
|                                                                                                                            |            | Injection, pantoprazole sodium                                                              | C9113          |                                     |                                                                                                                                 |
|                                                                                                                            |            | Injection, bupivacaine liposome                                                             | C9290          |                                     |                                                                                                                                 |
|                                                                                                                            |            | Hospital observation                                                                        | G0378          |                                     |                                                                                                                                 |
|                                                                                                                            |            | Drugs administered other than oral method                                                   | Jxxxx          |                                     |                                                                                                                                 |
|                                                                                                                            |            | Infusion, albumin (human), 5%                                                               | P9045          |                                     |                                                                                                                                 |
|                                                                                                                            |            | Injection, bupivacaine hydrochloride                                                        | S0020          |                                     |                                                                                                                                 |
|                                                                                                                            |            | Surgical techniques requiring use of robotic surgical system                                | S2900          |                                     |                                                                                                                                 |
|                                                                                                                            |            | Amniotic membrane for surgical reconstruction                                               | V2790          |                                     |                                                                                                                                 |
| Routine obstetric care for vaginal delivery, including pre-and post-delivery care (CPT 59400)                              | Inpatient  | <i>All services billed during inpatient stay</i>                                            |                |                                     | DRG other than 775 – Vaginal delivery without complicating diagnoses; or indication of cesarean delivery: 59510-622 also billed |
| Routine obstetric care for cesarean delivery, including pre-and post-delivery care (CPT 59510)                             | Inpatient  | <i>All services billed during inpatient stay</i>                                            |                |                                     | DRG other than 766 – Cesarean section without complication, comorbidity or major complication or comorbidity                    |
| Routine obstetric care for vaginal delivery after prior cesarean delivery including pre-and post-delivery care (CPT 59610) | Inpatient  | <i>All services billed during inpatient stay</i>                                            |                |                                     | DRG other than 775 – Vaginal delivery without complicating diagnoses; or indication of cesarean delivery: 59510-5 also billed   |
|                                                                                                                            | Outpatient | Facility fee                                                                                |                |                                     |                                                                                                                                 |

| Primary shoppable service                                                                                             | Setting    | Ancillary service included in package if billed together with the primary shoppable service   | Procedure code | Service-specific inclusion criteria | Package-specific exclusion criteria |
|-----------------------------------------------------------------------------------------------------------------------|------------|-----------------------------------------------------------------------------------------------|----------------|-------------------------------------|-------------------------------------|
| Injection of substance into spinal canal of lower back or sacrum using imaging guidance (CPT 62322, 62323)            |            | Anesthesia for non-invasive imaging                                                           | 01922          |                                     |                                     |
|                                                                                                                       |            | Anesthesia for percutaneous image guided procedures on the spine and spinal cord; therapeutic | 01936          |                                     |                                     |
|                                                                                                                       |            | Radiologic examination, spine, single view                                                    | 72020          |                                     |                                     |
|                                                                                                                       |            | Radiologic examination, spine, lumbosacral; 2 or 3 views                                      | 72100          |                                     |                                     |
|                                                                                                                       |            | Epidurography, radiological supervision and interpretation                                    | 72275          |                                     |                                     |
|                                                                                                                       |            | Fluoroscopic guidance and localization of needle or catheter tip for spine                    | 77003          |                                     |                                     |
|                                                                                                                       |            | Moderate sedation services                                                                    | 99152          |                                     |                                     |
|                                                                                                                       |            | Office or other outpatient visit for the evaluation and management of a new patient           | 99201-5        |                                     |                                     |
|                                                                                                                       |            | Office or other outpatient visit for the evaluation and management of an established patient  | 99211-5        |                                     |                                     |
|                                                                                                                       |            | Catheter, intraspinal                                                                         | C1755          |                                     |                                     |
|                                                                                                                       |            | Hospital outpatient clinic visit for assessment and management of a patient                   | G0463          |                                     |                                     |
|                                                                                                                       |            | Drugs administered other than oral method                                                     | Jxxxx          |                                     |                                     |
|                                                                                                                       |            | Low osmolar contrast material                                                                 | Q9965-7        |                                     |                                     |
| Injections of anesthetic and/or steroid drug into lower or sacral spine nerve root using imaging guidance (CPT 64483) | Outpatient | Facility fee                                                                                  |                |                                     |                                     |
|                                                                                                                       |            | Anesthesia for percutaneous image guided procedures on the spine and spinal cord; therapeutic | 01936          |                                     |                                     |
|                                                                                                                       |            | Anesthesia for diagnostic or therapeutic nerve blocks and injections, prone position          | 01992          |                                     |                                     |
|                                                                                                                       |            | Radiologic examination, spine, single view                                                    | 72020          |                                     |                                     |
|                                                                                                                       |            | Radiologic examination, spine, lumbosacral; 2 or 3 views                                      | 72100          |                                     |                                     |
|                                                                                                                       |            | Epidurography, radiological supervision and interpretation                                    | 72275          |                                     |                                     |
|                                                                                                                       |            | Fluoroscopic guidance and localization of needle or catheter tip for spine                    | 77003          |                                     |                                     |
|                                                                                                                       |            | Moderate sedation services                                                                    | 99152          |                                     |                                     |

| Primary shoppable service                                             | Setting    | Ancillary service included in package if billed together with the primary shoppable service                                        | Procedure code             | Service-specific inclusion criteria | Package-specific exclusion criteria |
|-----------------------------------------------------------------------|------------|------------------------------------------------------------------------------------------------------------------------------------|----------------------------|-------------------------------------|-------------------------------------|
|                                                                       |            | Office or other outpatient visit for the evaluation and management of a new patient                                                | 99201-5                    |                                     |                                     |
|                                                                       |            | Office or other outpatient visit for the evaluation and management of an established patient                                       | 99211-5                    |                                     |                                     |
|                                                                       |            | Hospital outpatient clinic visit for assessment and management of a patient                                                        | G0463                      |                                     |                                     |
|                                                                       |            | Drugs administered other than oral method                                                                                          | Jxxxx                      |                                     |                                     |
|                                                                       |            | Low osmolar contrast material                                                                                                      | Q9965-7                    |                                     |                                     |
|                                                                       |            | Injection, bupivacaine hydrochloride                                                                                               | S0020                      |                                     |                                     |
| Removal of recurring cataract in lens capsule using laser (CPT 66821) | Outpatient | Facility fee                                                                                                                       |                            |                                     |                                     |
|                                                                       |            | Scanning computerized ophthalmic diagnostic imaging, posterior segment, with interpretation and report; optic nerve                | 92134                      |                                     |                                     |
|                                                                       |            | Ophthalmological services: medical examination and evaluation, with initiation or continuation of diagnostic and treatment program | 92002, 92004, 92012, 92014 |                                     |                                     |
|                                                                       |            | Office or other outpatient visit for the evaluation and management of an established patient                                       | 99211-5                    |                                     |                                     |
|                                                                       |            | Hospital outpatient clinic visit for assessment and management of a patient                                                        | G0463                      |                                     |                                     |
| Removal of cataract with insertion of lens (CPT 66984)                | Outpatient | Facility fee                                                                                                                       |                            |                                     |                                     |
|                                                                       |            | Anesthesia for procedures on eye; lens surgery                                                                                     | 00140-00145                |                                     |                                     |
|                                                                       |            | Ophthalmic biometry by ultrasound echography; with intraocular lens power calculation                                              | 76519                      |                                     |                                     |
|                                                                       |            | Ophthalmic biometry by partial coherence interferometry with intraocular lens power calculation                                    | 92136                      |                                     |                                     |
|                                                                       |            | Lens, intraocular (new technology)                                                                                                 | C1780                      |                                     |                                     |
|                                                                       |            | Ocular implant, aqueous drainage assist device                                                                                     | C1783                      |                                     |                                     |
|                                                                       |            | Drugs administered other than oral method                                                                                          | Jxxxx                      |                                     |                                     |
|                                                                       |            | Posterior chamber intraocular lens                                                                                                 | V2632                      |                                     |                                     |
|                                                                       |            | Astigmatism correcting function of intraocular lens                                                                                | V2787                      |                                     |                                     |
|                                                                       |            | Presbyopia correcting function of intraocular lens                                                                                 | V2788                      |                                     |                                     |
| Electrocardiogram, routine, with                                      | Outpatient | Facility fee                                                                                                                       |                            |                                     |                                     |

| Primary shoppable service                                       | Setting    | Ancillary service included in package if billed together with the primary shoppable service                       | Procedure code | Service-specific inclusion criteria | Package-specific exclusion criteria |
|-----------------------------------------------------------------|------------|-------------------------------------------------------------------------------------------------------------------|----------------|-------------------------------------|-------------------------------------|
| interpretation and report (CPT 93000)                           |            |                                                                                                                   |                |                                     |                                     |
| Insertion of catheter into left heart for diagnosis (CPT 93452) | Outpatient | Facility fee                                                                                                      |                |                                     |                                     |
|                                                                 |            | Anesthesia for cardiac catheterization including coronary angiography and ventriculography                        | 01920          |                                     |                                     |
|                                                                 |            | Collection of venous blood by venipuncture                                                                        | 36415          |                                     |                                     |
|                                                                 |            | Laboratory & pathology services                                                                                   | 8xxxx          |                                     |                                     |
|                                                                 |            | Electrocardiogram, routine ECG; tracing only                                                                      | 93005          |                                     |                                     |
|                                                                 |            | Injection procedure during cardiac catheterization including imaging supervision; for supra-avalvular aortography | 93567          |                                     |                                     |
|                                                                 |            | Moderate sedation services                                                                                        | 99152          |                                     |                                     |
|                                                                 |            | Catheter, intravascular ultrasound                                                                                | C1753          |                                     |                                     |
|                                                                 |            | Drug wire                                                                                                         | C1769          |                                     |                                     |
|                                                                 |            | Catheter, guiding                                                                                                 | C1887          |                                     |                                     |
|                                                                 |            | Introducer/sheath, other than guiding, other than intracardiac electrophysiological                               | C1894          |                                     |                                     |
|                                                                 |            | Percutaneous transcatheter placement of drug eluting intracoronary stent(s)                                       | C9600          |                                     |                                     |
|                                                                 |            | Hospital observation                                                                                              | G0378          |                                     |                                     |
|                                                                 |            | Drugs administered other than oral method                                                                         | Jxxxx          |                                     |                                     |
| Low osmolar contrast material                                   | Q9967      |                                                                                                                   |                |                                     |                                     |
| Sleep study (CPT 95810)                                         | Outpatient | Facility fee                                                                                                      |                |                                     |                                     |
|                                                                 |            | Multiple sleep latency or maintenance of wakefulness testing, recording, analysis and interpretation              | 95805          |                                     |                                     |
|                                                                 |            | Office or other outpatient visit for the evaluation and management of a new patient                               | 99201-5        |                                     |                                     |
|                                                                 |            | Office or other outpatient visit for the evaluation and management of an established patient                      | 99211-5        |                                     |                                     |
| Physical therapy, therapeutic exercise (CPT 97110)              | Outpatient | Facility fee                                                                                                      |                |                                     |                                     |
|                                                                 |            | Application of a modality to 1 or more areas; hot or cold packs                                                   | 97010-6        |                                     |                                     |



| Primary shoppable service | Setting | Ancillary service included in package if billed together with the primary shoppable service                                                            | Procedure code | Service-specific inclusion criteria | Package-specific exclusion criteria |
|---------------------------|---------|--------------------------------------------------------------------------------------------------------------------------------------------------------|----------------|-------------------------------------|-------------------------------------|
|                           |         | Application of a modality to 1 or more areas; ultrasound                                                                                               | 97035          |                                     |                                     |
|                           |         | Neuromuscular reeducation of movement, balance, coordination, kinesthetic sense, posture, and/or proprioception for sitting and/or standing activities | 97112          |                                     |                                     |
|                           |         | Manual therapy techniques                                                                                                                              | 97140          |                                     |                                     |
|                           |         | Physical therapy evaluation                                                                                                                            | 97161-2        |                                     |                                     |
|                           |         | Therapeutic activities, direct (one-on-one) patient contact                                                                                            | 97530          |                                     |                                     |
|                           |         | Electrical stimulation (unattended), to one or more areas for indication(s) other than wound care, as part of a therapy plan of care                   | G0283          |                                     |                                     |

**Notes:** CPT, Current Procedural Terminology; DRG, Diagnosis-related group.

**eFigure 1.** Flowchart of Sample Inclusion and Exclusion Criteria

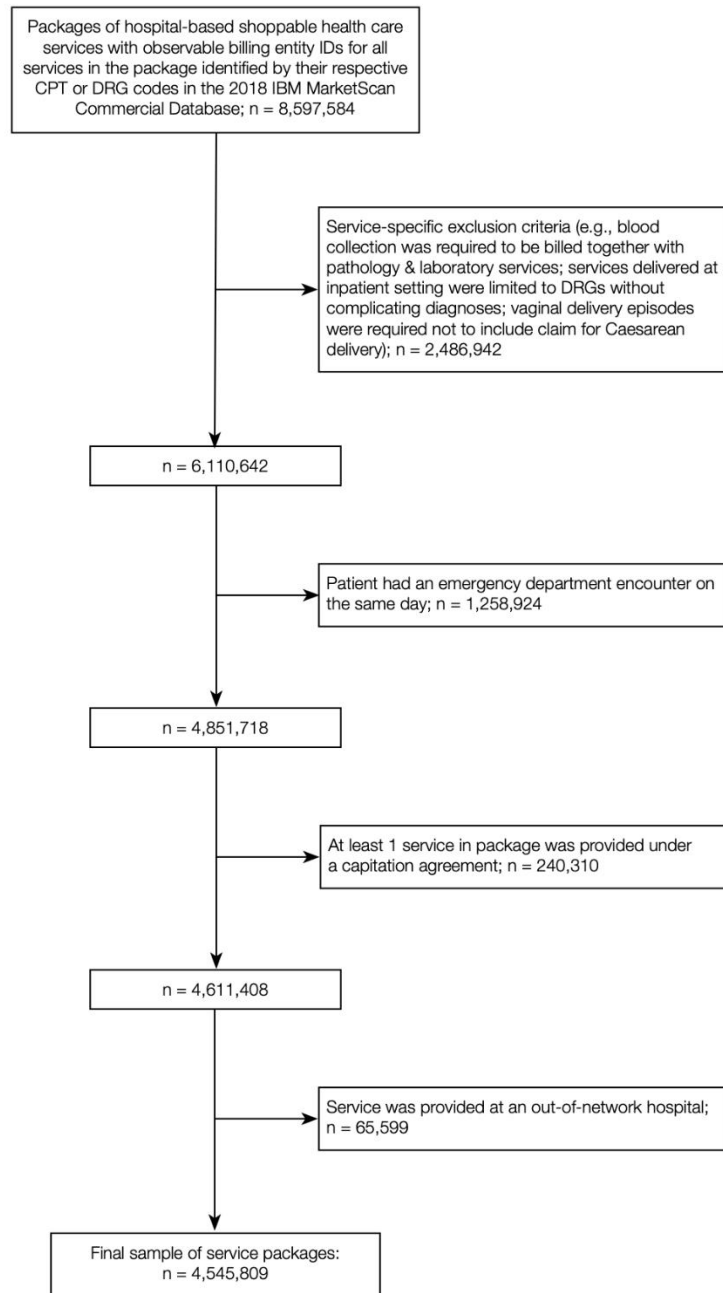

**Notes:** All 70 “shoppable” services proposed by the Centers for Medicare & Medicaid Services combined.

**eTable 2.** Flowchart of Sample Inclusion and Exclusion Criteria by Service

| Shoppable service                                                | Sample size                                                   |                                      |                      |                      |                            |
|------------------------------------------------------------------|---------------------------------------------------------------|--------------------------------------|----------------------|----------------------|----------------------------|
|                                                                  | (1)<br>Hospital-based care with observable billing entity IDs | (2)<br>Package-specific exclusions * | (3)<br>Non-emergency | (4)<br>Non-capitated | (5)<br>In-network hospital |
| <b>EVALUATION &amp; MANAGEMENT</b>                               |                                                               |                                      |                      |                      |                            |
| Psychotherapy, 30 min                                            | 9,018                                                         | 9,018                                | 8,952                | 8,111                | 7,126                      |
| Psychotherapy, 45 min                                            | 44,331                                                        | 44,331                               | 44,214               | 42,097               | 37,475                     |
| Psychotherapy, 60 min                                            | 18,427                                                        | 18,427                               | 18,369               | 17,229               | 14,940                     |
| Family psychotherapy, not including patient, 50 min              | 1,093                                                         | 1,093                                | 1,085                | 1,056                | 849                        |
| Family psychotherapy, including patient, 50 min                  | 4,839                                                         | 4,839                                | 4,819                | 4,641                | 4,074                      |
| Group psychotherapy                                              | 85,196                                                        | 85,196                               | 84,962               | 80,983               | 69,840                     |
| New patient office or other outpatient visit, typically 30 min   | 15,585                                                        | 15,585                               | 14,503               | 12,563               | 12,038                     |
| New patient office of other outpatient visit, typically 45 min   | 10,786                                                        | 10,786                               | 10,310               | 8,516                | 8,204                      |
| New patient office of other outpatient visit, typically 60 min   | 4,483                                                         | 4,483                                | 4,280                | 3,842                | 3,682                      |
| Patient office consultation, typically 40 min                    | 1,400                                                         | 1,400                                | 1,385                | 1,325                | 1,204                      |
| Patient office consultation, typically 60 min                    | 1,503                                                         | 1,503                                | 1,490                | 1,421                | 1,365                      |
| Initial new patient preventive medicine evaluation (18-39 years) | 960                                                           | 960                                  | 959                  | 913                  | 885                        |
| Initial new patient preventive medicine evaluation (40-64 years) | 655                                                           | 655                                  | 654                  | 632                  | 605                        |
| <b>LABORATORY &amp; PATHOLOGY</b>                                |                                                               |                                      |                      |                      |                            |
| Basic metabolic panel                                            | 488,178                                                       | 272,043                              | 170,540              | 156,048              | 154,801                    |
| Blood test, comprehensive group of blood chemicals               | 1,285,020                                                     | 799,610                              | 582,264              | 547,507              | 542,383                    |
| Obstetric blood test panel                                       | 2,509                                                         | 2,019                                | 2,002                | 1,906                | 1,880                      |
| Blood test, lipids (cholesterol and triglycerides)               | 553,780                                                       | 415,667                              | 402,910              | 384,367              | 381,804                    |
| Kidney function panel test                                       | 20,357                                                        | 13,768                               | 12,582               | 11,844               | 11,666                     |
| Liver function blood test panel                                  | 138,358                                                       | 73,727                               | 46,879               | 44,333               | 43,972                     |

| Shoppable service                                                                                   | Sample size                                                   |                                      |                      |                      |                            |
|-----------------------------------------------------------------------------------------------------|---------------------------------------------------------------|--------------------------------------|----------------------|----------------------|----------------------------|
|                                                                                                     | (1)<br>Hospital-based care with observable billing entity IDs | (2)<br>Package-specific exclusions * | (3)<br>Non-emergency | (4)<br>Non-capitated | (5)<br>In-network hospital |
| Manual urinalysis test with examination using microscope                                            | 444,413                                                       | 192,361                              | 87,567               | 80,264               | 79,415                     |
| Automated urinalysis test                                                                           | 278,635                                                       | 108,014                              | 48,115               | 42,677               | 42,215                     |
| PSA (prostate specific antigen)                                                                     | 79,909                                                        | 56,902                               | 56,659               | 54,232               | 53,810                     |
| Blood test, thyroid stimulating hormone (TSH)                                                       | 492,189                                                       | 359,758                              | 332,483              | 315,369              | 313,096                    |
| Complete blood cell count, with differential white blood cells, automated                           | 1,433,785                                                     | 856,990                              | 557,362              | 521,210              | 515,839                    |
| Complete blood count, automated                                                                     | 411,063                                                       | 221,654                              | 179,949              | 165,433              | 164,160                    |
| Blood test, clotting time                                                                           | 288,222                                                       | 147,855                              | 86,624               | 77,005               | 76,115                     |
| Coagulation assessment blood test                                                                   | 157,760                                                       | 87,887                               | 42,879               | 37,036               | 36,616                     |
| <b>RADIOLOGY</b>                                                                                    |                                                               |                                      |                      |                      |                            |
| CT scan, head or brain, without contrast                                                            | 112,963                                                       | 112,963                              | 9,635                | 9,322                | 9,144                      |
| MRI scan of brain before and after contrast                                                         | 43,808                                                        | 43,808                               | 38,887               | 38,258               | 37,334                     |
| X-Ray, lower back, minimum four views                                                               | 20,610                                                        | 20,610                               | 17,197               | 16,741               | 16,570                     |
| MRI scan of lower spinal canal                                                                      | 31,135                                                        | 31,135                               | 28,802               | 28,204               | 27,892                     |
| CT scan, pelvis, with contrast                                                                      | 1,795                                                         | 1,795                                | 896                  | 870                  | 832                        |
| MRI scan of leg joint                                                                               | 36,556                                                        | 36,556                               | 36,150               | 35,570               | 35,210                     |
| CT scan of abdomen and pelvis with contrast                                                         | 147,238                                                       | 147,238                              | 51,028               | 49,837               | 47,555                     |
| Ultrasound of abdomen                                                                               | 41,870                                                        | 41,870                               | 35,641               | 34,794               | 34,430                     |
| Abdominal ultrasound of pregnant uterus (greater or equal to 14 weeks 0 days) single or first fetus | 19,375                                                        | 19,375                               | 17,460               | 17,044               | 16,724                     |
| Ultrasound pelvis through vagina                                                                    | 70,085                                                        | 70,085                               | 51,518               | 50,339               | 49,759                     |
| Mammography of one breast                                                                           | 62,256                                                        | 62,256                               | 62,146               | 58,500               | 57,892                     |
| Mammography of both breasts                                                                         | 52,260                                                        | 52,260                               | 52,168               | 50,875               | 50,226                     |
| Mammography, screening, bilateral                                                                   | 431,493                                                       | 431,493                              | 430,836              | 421,853              | 418,328                    |
| <b>MEDICINE &amp; SURGERY</b>                                                                       |                                                               |                                      |                      |                      |                            |
| Cardiac valve and other major cardiothoracic                                                        | 110                                                           | 110                                  | 23                   | 23                   | 22                         |

| Shoppable service                                                                                                          | Sample size                                                   |                                      |                      |                      |                            |
|----------------------------------------------------------------------------------------------------------------------------|---------------------------------------------------------------|--------------------------------------|----------------------|----------------------|----------------------------|
|                                                                                                                            | (1)<br>Hospital-based care with observable billing entity IDs | (2)<br>Package-specific exclusions * | (3)<br>Non-emergency | (4)<br>Non-capitated | (5)<br>In-network hospital |
| procedures with cardiac catheterization with major complications or comorbidities                                          |                                                               |                                      |                      |                      |                            |
| Spinal fusion except cervical without major comorbid conditions or complications                                           | 2,273                                                         | 2,273                                | 2,152                | 2,132                | 2,072                      |
| Major joint replacement or reattachment of lower extremity without major comorbid conditions or complications              | 12,910                                                        | 12,910                               | 12,716               | 12,556               | 12,257                     |
| Cervical spinal fusion without comorbid conditions or major comorbid conditions or complications                           | 832                                                           | 832                                  | 779                  | 762                  | 726                        |
| Uterine and adnexa procedures for non-malignancy without comorbid conditions or major comorbid conditions or complications | 2,877                                                         | 2,877                                | 2,767                | 2,718                | 2,663                      |
| Removal of 1 or more breast growth, open procedure                                                                         | 1,663                                                         | 1,663                                | 1,653                | 1,633                | 1,611                      |
| Shaving of shoulder bone using an endoscope                                                                                | 4,506                                                         | 4,506                                | 4,482                | 4,428                | 4,376                      |
| Removal of one knee cartilage using an endoscope                                                                           | 7,381                                                         | 7,381                                | 7,351                | 7,090                | 6,974                      |
| Removal of tonsils and adenoid glands patient younger than age 12                                                          | 4,268                                                         | 4,268                                | 4,237                | 4,182                | 4,131                      |
| Diagnostic examination of esophagus, stomach, and/or upper small bowel using an endoscope                                  | 7,316                                                         | 7,316                                | 6,784                | 6,556                | 6,403                      |
| Biopsy of the esophagus, stomach, and/or upper small bowel using an endoscope                                              | 48,766                                                        | 48,766                               | 46,924               | 45,607               | 44,596                     |
| Diagnostic examination of large bowel using an endoscope                                                                   | 28,100                                                        | 28,100                               | 27,833               | 27,453               | 26,889                     |
| Biopsy of large bowel using an endoscope                                                                                   | 44,035                                                        | 44,035                               | 43,627               | 42,621               | 41,672                     |

| Shoppable service                                                                                              | Sample size                                                   |                                      |                      |                      |                            |
|----------------------------------------------------------------------------------------------------------------|---------------------------------------------------------------|--------------------------------------|----------------------|----------------------|----------------------------|
|                                                                                                                | (1)<br>Hospital-based care with observable billing entity IDs | (2)<br>Package-specific exclusions * | (3)<br>Non-emergency | (4)<br>Non-capitated | (5)<br>In-network hospital |
| Removal of polyps or growths of large bowel using an endoscope                                                 | 28,419                                                        | 28,419                               | 28,224               | 27,594               | 27,131                     |
| Ultrasound examination of lower large bowel using an endoscope                                                 | 53                                                            | 53                                   | 53                   | 50                   | 43                         |
| Removal of gallbladder using an endoscope                                                                      | 12,715                                                        | 10,984                               | 8,717                | 8,623                | 8,487                      |
| Repair of groin hernia patient age 5 years or older                                                            | 2,631                                                         | 2,631                                | 2,609                | 2,578                | 2,546                      |
| Biopsy of prostate gland                                                                                       | 1,366                                                         | 1,366                                | 1,356                | 1,349                | 1,277                      |
| Surgical removal of prostate and surrounding lymph nodes using an endoscope                                    | 1,365                                                         | 1,110                                | 1,105                | 1,099                | 1,046                      |
| Routine obstetric care for vaginal delivery, including pre-and post-delivery care                              | 46,616                                                        | 38,615                               | 33,611               | 33,316               | 32,753                     |
| Routine obstetric care for cesarean delivery, including pre-and post-delivery care                             | 23,470                                                        | 12,656                               | 11,706               | 11,592               | 11,391                     |
| Routine obstetric care for vaginal delivery after prior cesarean delivery including pre-and post-delivery care | 1,203                                                         | 985                                  | 834                  | 828                  | 815                        |
| Injection of substance into spinal canal of lower back or sacrum using imaging guidance                        | 8,545                                                         | 8,545                                | 8,452                | 8,249                | 8,076                      |
| Injections of anesthetic and/or steroid drug into lower or sacral spine nerve root using imaging guidance      | 8,986                                                         | 8,986                                | 8,922                | 8,643                | 8,384                      |
| Removal of recurring cataract in lens capsule using laser                                                      | 450                                                           | 450                                  | 450                  | 440                  | 433                        |
| Removal of cataract with insertion of lens                                                                     | 5,716                                                         | 5,716                                | 5,707                | 5,634                | 5,544                      |
| Electrocardiogram, routine, with interpretation and report                                                     | 5,459                                                         | 5,459                                | 1,709                | 1,555                | 1,495                      |
| Insertion of catheter into left heart for diagnosis                                                            | 57                                                            | 57                                   | 48                   | 46                   | 45                         |
| Sleep study                                                                                                    | 13,153                                                        | 13,153                               | 13,138               | 12,888               | 12,768                     |

|                                           | Sample size                                                                   |                                                |                          |                          |                               |
|-------------------------------------------|-------------------------------------------------------------------------------|------------------------------------------------|--------------------------|--------------------------|-------------------------------|
| Shoppable service                         | (1)<br>Hospital-<br>based care<br>with<br>observable<br>billing<br>entity IDs | (2)<br>Package-<br>specific<br>exclusions<br>* | (3)<br>Non-<br>emergency | (4)<br>Non-<br>capitated | (5)<br>In-network<br>hospital |
| Physical therapy,<br>therapeutic exercise | 928,445                                                                       | 928,445                                        | 926,588                  | 894,396                  | 887,228                       |

**Notes:** Package-specific exclusions are described in eTable 1.

**eFigure 2.** Total Reimbursement for Service Packages Ranked by the Portion of Reimbursement Billed by the Hospital for Selected Common Shoppable Health Care Services

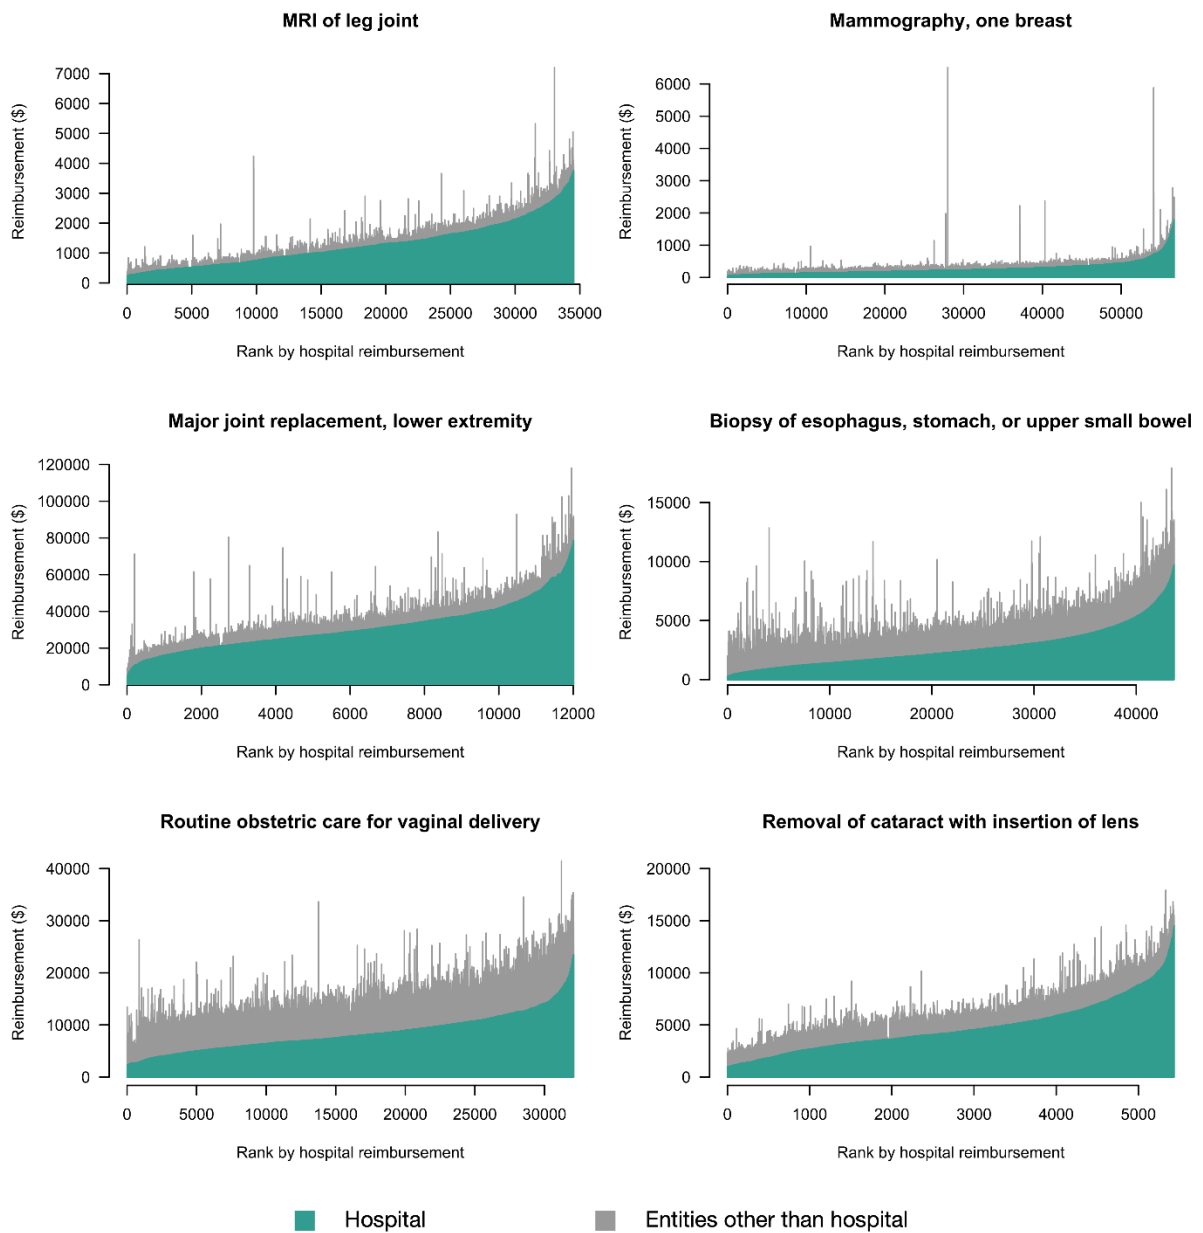

Notes: For better image quality, service packages with hospital reimbursement in the 1st and 99th percentiles were excluded from the visualizations.
